# Supplementary material for: An unusual eight-connected self-penetrating ilc net constructed by dinuclear lanthanide building units
Source: Royal Society of Chemistry journal article supplement (doi:10.1039/b715058j), 2008-01-01
Supplement: b715058j.pdf [file b715058j.pdf]

## Supporting Information

### *An unusual eight-connected self-penetrating “ilc” net constructed by dinuclear lanthanide building units*

Jian-Wen Cheng,<sup>a</sup> Shou-Tian Zheng,<sup>a</sup> Wei Liu,<sup>c</sup> and Guo-Yu Yang<sup>\*ab</sup>

<sup>a</sup> State Key Laboratory of Structural Chemistry, Fujian Institute of Research on the Structure of Matter, and Graduate School of the Chinese Academy of Sciences, Fuzhou, Fujian 350002 (China).

<sup>b</sup> State Key Laboratory of Rare Earth Materials and Applications, Peking University, Beijing 100871 (China).

<sup>c</sup> College of Material Science and Engineering, Shandong University of Technology, Zibo, Shandong 255049 (China).

E-mail: ygy@ffirms.ac.cn; Fax: (+86) 591-8371-0051

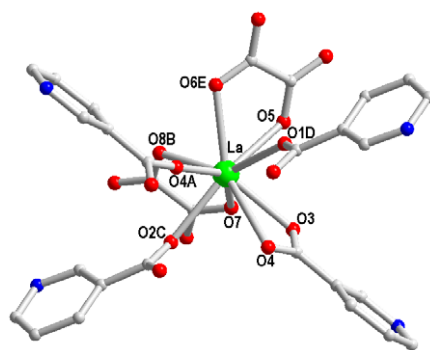

**Figure S1.** The coordination environments of La atom in **1**. Atoms having “A”, “B”, “C”, “D”, or “E” in their labels are symmetry-generated. Symmetry code A:  $-x + 1, -y, -z + 2$ ; B:  $-x + 2, -y, -z + 2$ ; C:  $-x + 2, y - 1/2, -z + 5/2$ ; D:  $x - 1, -y + 1/2, z - 1/2$ ; E:  $-x + 1, -y, -z + 1$ .

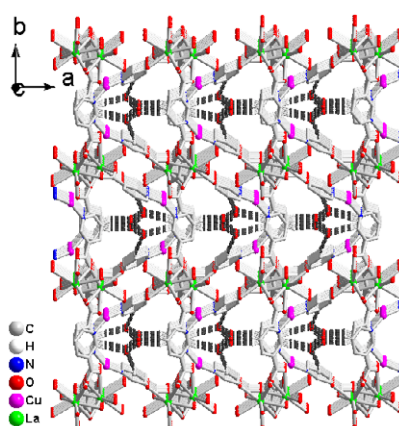

**Figure S2.** Hydrogen bonds of the solvent waters in the compound **1**. The 1-D water chains interact with the framework through hydrogen bonds: C8A-H8A $\cdots$ OW1(A:  $1 + x, y, z$ ): 2.725(8) Å, C2B-H2B $\cdots$ OW2(B:  $x, 0.5 - y, 0.5 - z$ ): 3.038(5) Å, C11-H11 $\cdots$ OW2: 2.702 (7) Å, OW1 $\cdots$ OW2: 2.795(8)-2.912(10) Å..

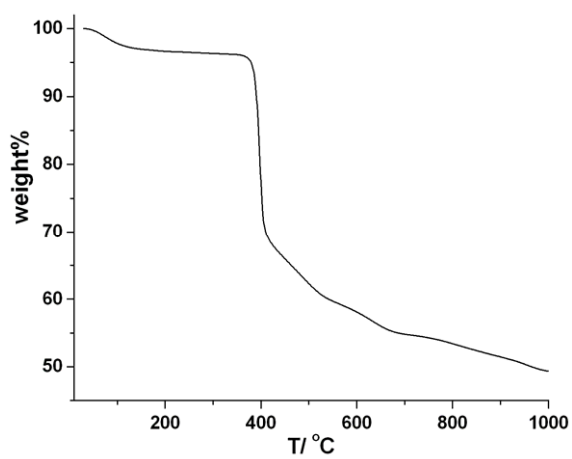

**Figure S3.** TG curve of **1**.

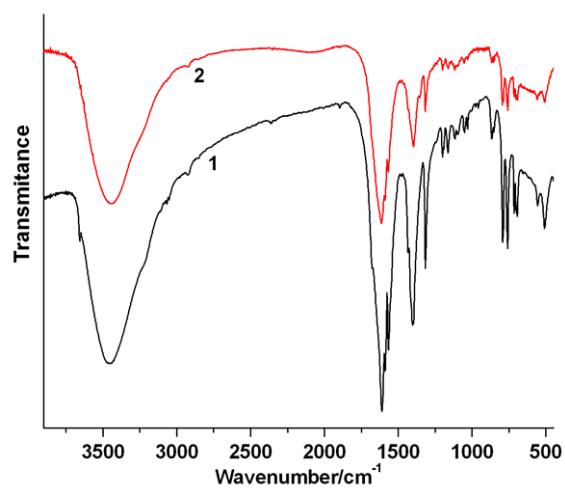

**Figure S4.** The IR spectra of **1-2**, respectively.
